# Supplementary material for: A ferrocene/imprinted polymer nanomaterial-modified carbon paste electrode as a new generation of gate effect-based voltammetric sensor
Source: Royal Society of Chemistry journal article supplement (doi:10.1039/c7nj03396f), 2018-01-01
Supplement: c7nj03396f1.pdf [file c7nj03396f1.pdf]

## Supplementary Information

*New Journal of Chemistry*

### Ferrocene/imprinted polymer nanomaterial-modified carbon paste electrode as a new generation of the gate effect-based voltammetric sensor

Taher Alizadeh\*, Maedeh Akhoundian, Mohammad Reza Ganjali

Department of Analytical chemistry, Faculty of chemistry, university college of science, University of  
Tehran, P.O. Box 14155-6455 Tehran, Iran

Email: talizadeh@ut.ac.ir

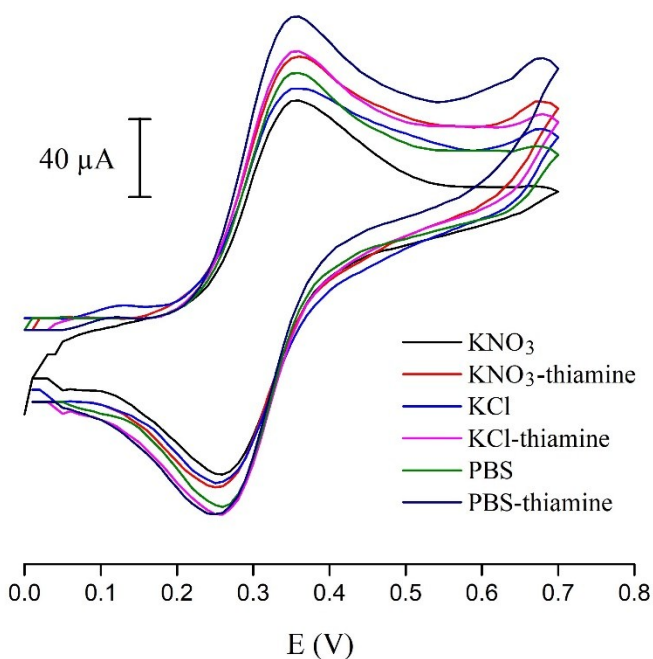

**Fig. S1** Cyclic voltammograms of modified electrode in different electrolytes; PBS, KCl and KNO<sub>3</sub> (0.1 M, pH=9) with or without 10<sup>-6</sup> M of thiamine; (Conditions: Estep= 5 mV, scan rate= 50 mV, %Fc= 1, %MIP=4, volume= 15 mL).
